# Supplementary material
Source: publisher site journal article supplement (https://www.dovepress.com/get_supplementary_file.php?f=448876.docx)
Supplement: Supplementary file 1 [file get_supplementary_file.php]

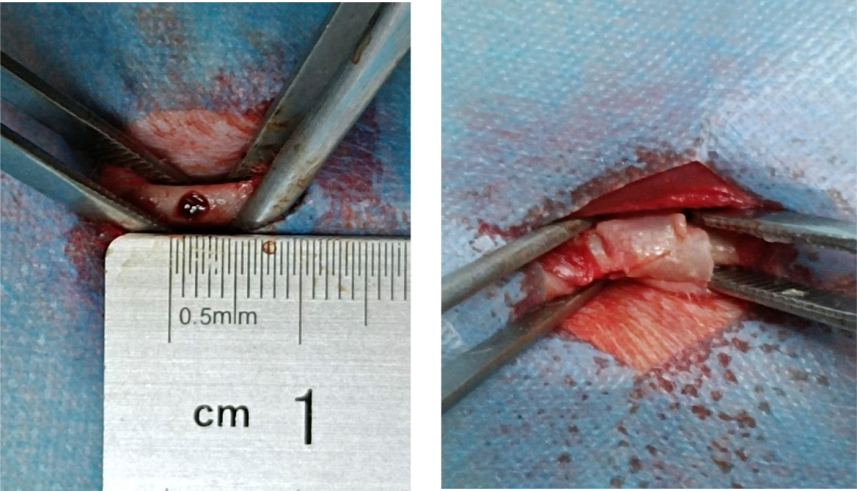


**Figure S1.** Animal experiment operation process. Preparation of bone defect and implantation of bacteria.


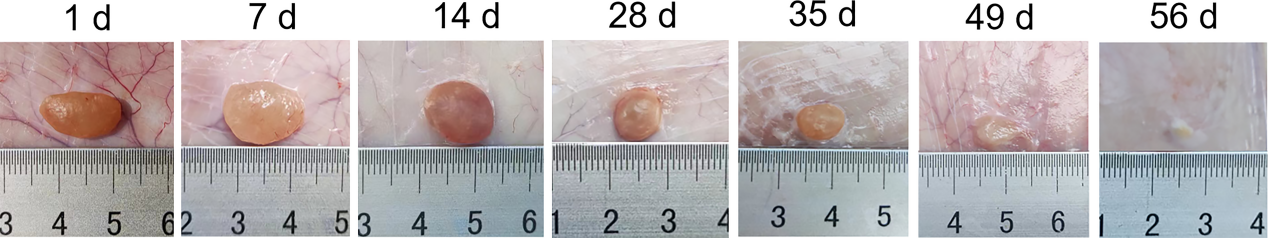


**Figure S2.** Degradation process of the hydrogels *in vivo.* External image of the hydrogel degradation process in 56 days.


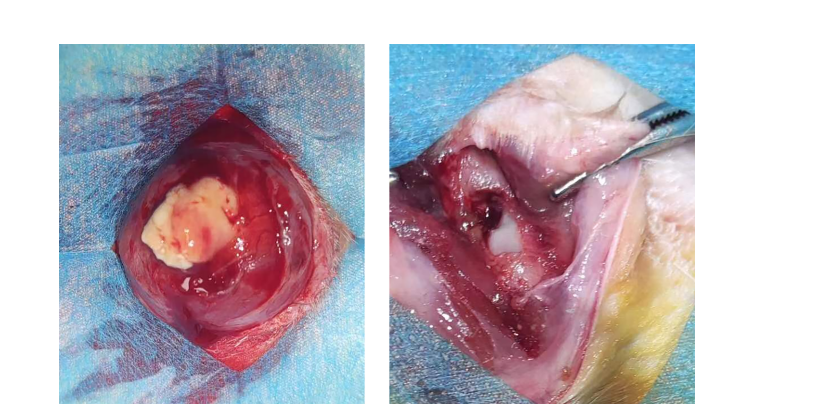


**Figure S3.** External image of bone defect after 4 weeks of bacterial implantation and external image after debridement.

**
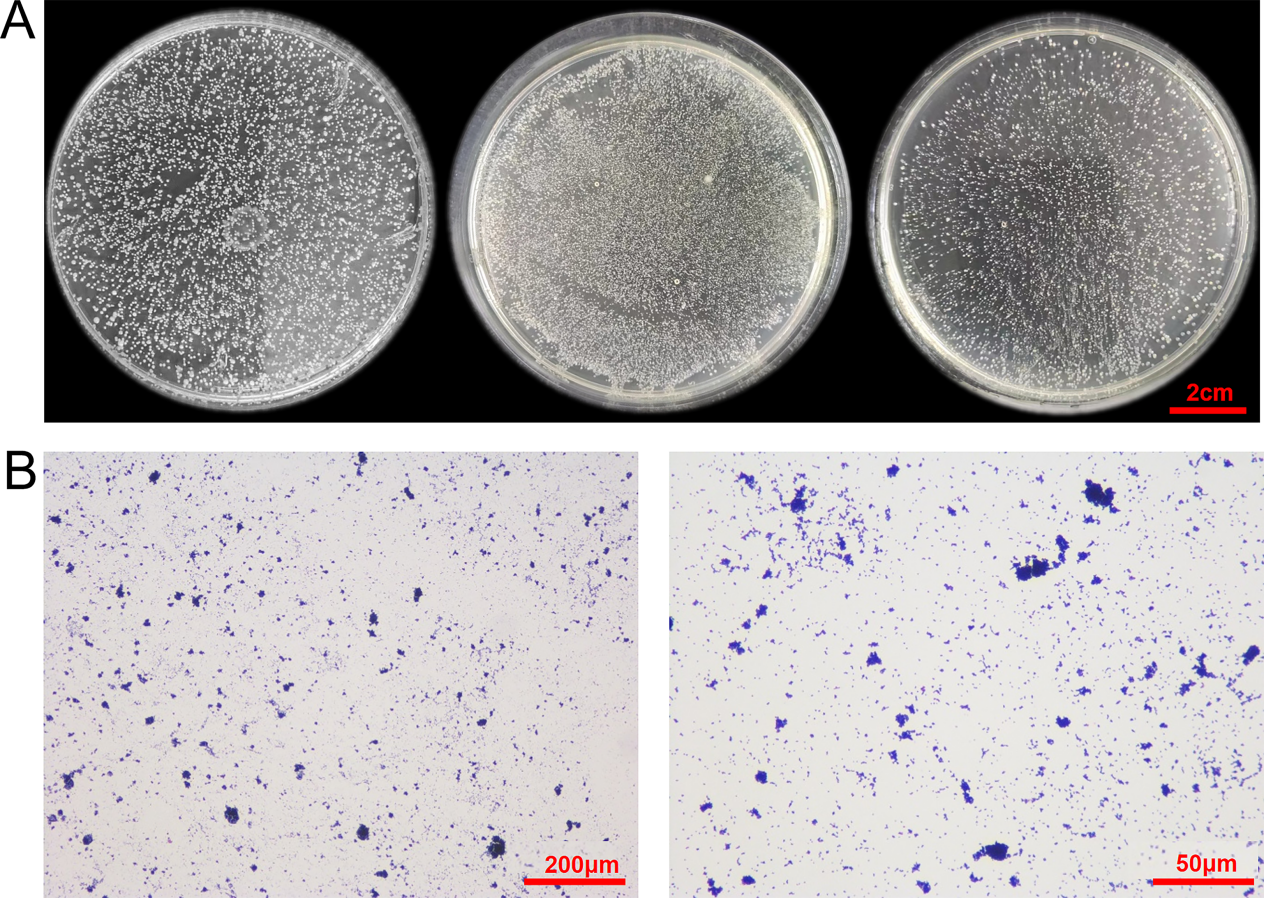
**

**Figure S4.** Verification of infected bone defect in rats. (A) Coating test of bacteria removed from rat femur after 4 weeks of bacterial implantation; (B) Gram staining of the obtained bacteria.
